# Supplementary material
Source: PubMed Central journal article supplement (PMC8975641)
Supplement: EMS142185-supplement-SI_flat_file.pdf [file EMS142185-supplement-SI_flat_file.pdf]

## Supplementary Methods

### Short protocol and timeline for the optimized procedure to obtain mitochondrial point mutants by TALEN-GDM

1. Transform the nuclear genome of tobacco (*N. tabacum*) with the construct encoding mitochondrially targeted TALENs using standard protocols for *Agrobacterium tumefaciens*-mediated transformation.
2. Isolate transgenic lines (T<sub>0</sub> plants) by suitable selection and regeneration protocols.
3. Screen T<sub>0</sub> plants (or their T<sub>1</sub> offspring) for TALEN cleavage activity by testing for DNA cuts at the TALEN target sites by Southern blotting.
4. Maintain lines with active TALENs by plant propagation via selfing (or cross-fertilization with wild-type pollen).
5. Germinate T<sub>1</sub> seeds from TALEN-active lines in sterile culture with the appropriate antibiotic to ensure presence of the TALEN transgene.
6. Prick out individual resistant seedlings, and transfer them to sterile Magenta boxes with synthetic medium (after approximately 2-3 weeks).
7. Harvest young leaves and cut them into pieces of approximately 4 mm x 4 mm (4-6 weeks after pricking out). Transfer the explants to shoot induction medium supplemented with 0.002% (w/v) ethidium bromide.
8. When shoots appear (after 4-8 weeks), transfer individual shoots to Magenta boxes with synthetic medium (without ethidium bromide). Harvest tissue samples from the three youngest leaves for genotyping (by PCR and DNA sequencing).
9. If genotyping does not reveal any mutation at the target site, take new leaves from the transferred shoots from step (8), and start again at step (7). If genotyping reveals mutations at the target locus, continue with step (10).
10. To achieve homochondriomy, take at least three consecutive new leaves from the transferred shoots from step (8), cut them into pieces of approximately 4 mm x 4 mm, and place the explants onto the surface of shoot induction medium (not supplemented with ethidium bromide).
11. When shoots start appearing (after approximately 4 weeks), take individual shoots and transfer them to boxes with synthetic medium (without ethidium bromide). Harvest material from the three youngest leaves for genotyping by PCR and DNA sequencing. To avoid wild-type signals from promiscuous mitochondrial DNA sequences in the nuclear genome, isolate mitochondrial DNA or use cDNA. If cDNA is used, amplify and sequence a fragment that ideally contains at least one RNA editing site.
12. If genotyping reveals continued heterochondriomy of the mutation at the target site, take new leaves from the transferred shoots from step (11) and start again at step

- (10). If genotyping reveals homochondriomy of the mutation at the target locus, continue with step (13).
13. Let the shoots from step (11) that tested positive for homochondriomy in step (12) root and continue to grow until the plantlets can be transferred to soil and grown in the greenhouse. Upon flowering, fertilize the plants with wild-type pollen to (i) reduce the (epi-)genetic burden imposed by tissue culture, and (ii) facilitate outcrossing of the nuclear transgenes (including the TALEN genes).
  14. Raise the next generation from seeds harvested after step (13). Grow plants to maturity under standard greenhouse conditions. Reconfirm presence and homochondriomy of the desired mitochondrial mutation, and verify absence of TALEN transgenes by genotyping via PCR. Fertilize plants with wild-type pollen, and harvest seeds. If the mitochondrial mutation is confirmed, TALEN transgenes are absent, and enough seeds have been obtained, the procedure is complete. If TALEN transgene(s) are still present in all progeny tested, continue with step (15).
  15. Grow plants from seeds harvested in step (14) in the greenhouse, check for presence and homochondriomy of the desired mitochondrial mutation, and test for absence of TALEN transgenes by (PCR-based) genotyping. Select plants with the mitochondrial mutation confirmed and absence of TALEN transgenes verified. Fertilize again with wild-type pollen. The procedure is complete after seed harvest.

Remark: Always work with as many lines and/or individual plants in parallel as possible. It is recommended to test several dozen lines (regenerated shoots) in steps (2) and (11), and at least a hundred shoots in step (8).

See also Fig. 2 and Extended Data Fig. 1.

**Supplementary Table 1.** Overview of mitochondrial mutants obtained from TALEN-GDM of *nad9*.

| Nucleotide exchange | Amino acid exchange | Line names                                                      |
|---------------------|---------------------|-----------------------------------------------------------------|
| G254T               | R85L                | R85L-1 <sup>a</sup>                                             |
| C265A               | Q89K                | Q89K-1 <sup>a</sup> and Q89K-2 <sup>b</sup>                     |
| C269A               | T90N                | T90N-1 <sup>a</sup> (lost; line could not be recovered)         |
| A271G               | S91G                | S91G-1 <sup>c</sup> and S91G-2 <sup>a</sup>                     |
| G272A               | S91N                | S91N-1 <sup>d</sup> and S91N-2 <sup>e</sup>                     |
| T273C               | S91S                | S91S-1 <sup>f</sup>                                             |
| A276G               | A92A                | A92A-1 <sup>g</sup> and A92A-2 <sup>h</sup>                     |
| G277A               | D93N                | D93N-1 <sup>f</sup> , D93N-2 <sup>i</sup> , D93N-3 <sup>i</sup> |
| A278G               | D93G                | D93G-1 <sup>a</sup>                                             |
| C279A/G280A         | D93E/E94K           | D93E/E94K-1 <sup>a</sup>                                        |
| G280A               | E94K                | E94K-1 <sup>f</sup> and E94K-2 <sup>e</sup> (line 2 died)       |
| G283A               | V95I                | V95I-1 <sup>a</sup>                                             |
| T284A               | V95E                | V95E-1 <sup>b</sup>                                             |

<sup>a</sup> from experiment described in Table 1

<sup>b</sup> constant light and 0.001% ethidium bromide (EtBr); obtained after 1<sup>st</sup> regeneration round (Rr); seeds not treated with mutagen

<sup>c</sup> no mutagen employed; 16 h light / 8 h dark; mutation detected in 6<sup>th</sup> Rr

<sup>d</sup> seeds incubated in 5 mM N-nitroso-N-ethylurea (NEU) for 2 h before sowing, leaves from seedlings cut and incubated in 5 mM NEU before exposure to regeneration medium without mutagen for 1<sup>st</sup> Rr; 1 out of 5 shoots analyzed had a mutation

<sup>e</sup> leaves from 5 shoots obtained in <sup>d</sup> incubated in 5 mM NEU and regenerated on medium without mutagen (2<sup>nd</sup> Rr); line S91N-2 possibly clonally derived from line S91N-1

<sup>f</sup> seeds incubated in 0.2% EtBr at 4°C for 40-44 h before sowing, leaves from seedlings cut and incubated in 5 mM NEU prior to regeneration on medium without mutagen; mutations detected after 2<sup>nd</sup> Rr

<sup>g</sup> seeds incubated in 0.2% EtBr at 4°C for 40-44 h before sowing, 1<sup>st</sup> Rr on medium without mutagen, 2<sup>nd</sup> Rr on 0.001% EtBr; mutation found in all shoots of 2<sup>nd</sup> Rr (i.e., likely already present in 1<sup>st</sup> Rr)

<sup>h</sup> from a supertransformation experiment with the TALEN line; mutation detected in T<sub>1</sub> plants

<sup>i</sup> seeds incubated in 5 mM NEU for 2 h before sowing, 1<sup>st</sup> Rr on medium without mutagen, 2<sup>nd</sup> Rr on 0.0002% EtBr; mutation detected after 2<sup>nd</sup> Rr

<sup>j</sup> line obtained from <sup>e</sup>; not further propagated (due to redundancy with lines D93N-1 and -2)

<sup>d,e,f,g,h,j</sup> 16 h day length until 1<sup>st</sup> Rr; constant light in 2<sup>nd</sup> Rr

**Supplementary Table 2.** List of oligonucleotides used in this study.

| Name    | Sequence (5' → 3')                            | Target                   |
|---------|-----------------------------------------------|--------------------------|
| oJF060  | GTTGTGTGGAATTGTGAGC                           | adapter                  |
| oJF271  | AACAGGTACCGTTGGGAGACTTTACCCAAG                | <i>nad9</i>              |
| oJF272  | TGTTGGATCCTTATCCGTCGCTACGCTGT                 | <i>nad9</i>              |
| oJF311  | CCAAGCAATGCCCAAAAGTCCCATGC                    | <i>nad9</i> (upstream)   |
| oJF317  | AACAGGTCTCAGACTAAATTTCAATTGTTGTGCTTTCTG       | <i>nad9</i>              |
| oJF496  | GAGTTGATTATCCCTCTCGA                          | <i>nad9</i>              |
| oJF499  | TCTTGGGTCATCTCAATGGG                          | <i>nad9</i>              |
| oJF650* | AGAGCTCACAATTCCACACAACGAAC                    | adapter                  |
| oJF651  | GTTGTGTGGAATTGTGAGCTCT                        | adapter                  |
| oJF748  | ATGCCGGACATCTTAAGGAG                          | adapter                  |
| oJF1026 | ATGCCGGACATCTTAAGGAGTCTGTACTGCTGAGAACCAC      | $\beta$ -TUBULIN         |
| oJF1027 | CGTTCATCAACTAGTTGAAAATGCAG                    | $\beta$ -TUBULIN         |
| oJF1028 | GAACCTTACAATGCTACTCTGTC                       | $\beta$ -TUBULIN         |
| oJF1029 | TCTGTACTGCTGAGAACCAC                          | $\beta$ -TUBULIN         |
| oJF1113 | ATGCCGGACATCTTAAGGAGAATAGCATTTCCTATTGATTTGTCC | <i>nad9</i> (downstream) |
| oJF1144 | ATGCCGGACATCTTAAGGAGAAATGGGACCGCGAAGACAAC     | <i>atp9</i> (downstream) |
| oJF1145 | CCTATGCTTTGCATGAACATCTC                       | <i>atp9</i> (upstream)   |
| oJF1147 | GTGTATCCAAGTTTGCGCAAG                         | TALEN                    |
| oJF1298 | AGATTACGCTGCTCAGTGCA                          | HA-tag                   |
| oJF1299 | GACATTGACTACAAGGATGACGA                       | FLAG-tag                 |
| oJF1300 | ATGCCGGACATCTTAAGGAGAGCGACGGTCCCTAACGCT       | TALEN                    |
| oJF1301 | TCCAAAGTACGTTTCGTGACG                         | adapter                  |
| oJF1302 | TCCAAAGTACGTTTCGTGACGCATATCCCAAACCTTCTCGCTC   | <i>nad9</i>              |

|         |                         |             |
|---------|-------------------------|-------------|
| oJF1304 | CATACCTATACAAGGGTTCAAG  | <i>nad9</i> |
| oJF1305 | CCCACAAATGAATAGGAAGCG   | Nt mtDNA    |
| oJF1306 | GTACAGGGTAGTACTCTTGG    | Nt mtDNA    |
| oJF1307 | GTTCAATGGTAACGACTTCTTCC | Nt mtDNA    |
| oJF1308 | GGTTTGGAACACCAATTCCTC   | Nt mtDNA    |
| oJF1309 | CGTCTTCCTTTATGCTTCCC    | Nt mtDNA    |
| oJF1310 | GATGATGCAGGCATCAGAG     | Nt mtDNA    |
| oJF1311 | TTTCGTAGGCAGCTCTCGA     | Nt mtDNA    |
| oJF1312 | CTCGATCAACTAGTAGACTTGC  | Nt mtDNA    |
| oJF1313 | CGTAGCATCATAAGGAGGAC    | Nt mtDNA    |
| oJF1314 | CCTTATCAGTGAACCGGAAC    | Nt mtDNA    |
| oJF1315 | ATCAGGTGTCCTCTTGGATG    | Nt mtDNA    |
| oJF1316 | CACCCACGACAAAATGTCC     | Nt mtDNA    |
| oJF1317 | CTAGGCATTCAAAGGAGGGT    | Nt mtDNA    |
| oJF1318 | CGCTATCTAAAGTAACCTTGCAG | Nt mtDNA    |
| oJF1319 | TCCTTGCCTCTGTTGACAC     | Nt mtDNA    |
| oJF1320 | GAATAGGGCATTTTGGCACTG   | Nt mtDNA    |
| oJF1323 | AGCGACGGTCCCTAACGCT     | TALEN       |

\* with monophosphate group at 5' end
