# Supplementary material
Source: PubMed Central journal article supplement (PMC8975641)

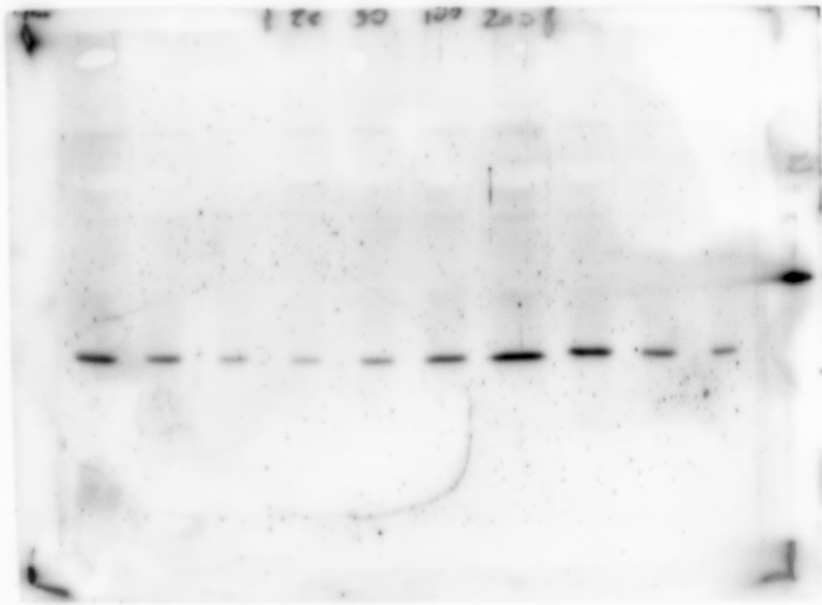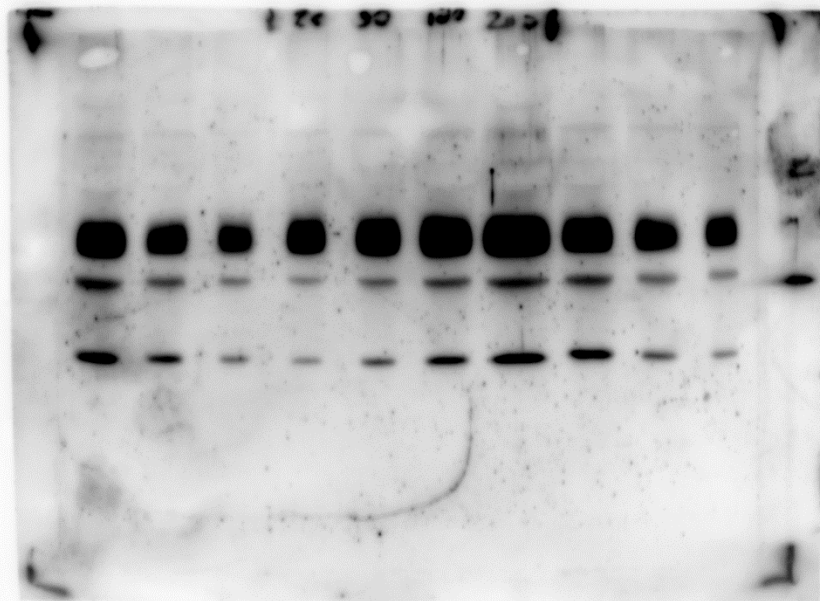

Supplement: EMS142185-supplement-Source_Data_EDFig9c_2_3.pdf [file EMS142185-supplement-Source_Data_EDFig9c_2_3.pdf]
